# Supplementary material
Source: PubMed Central journal article supplement (PMC6425939)
Supplement: NIHMS960887-supplement-Material.pdf [file NIHMS960887-supplement-Material.pdf]

# Efficacy and Safety of Switching to E/C/F/TAF in Virologically Suppressed Women

Sally Hodder,<sup>1</sup> Kathleen Squires,<sup>2</sup> Cissy Kityo,<sup>3</sup> Debbie Hagins,<sup>4</sup> Anchalee Avihingsanon,<sup>5</sup> Yulia Plotnikova,<sup>6</sup> Shuping Jiang,<sup>7</sup> Rima Kulkarni,<sup>7</sup> Andrew Cheng,<sup>7</sup> Huyen Cao<sup>7</sup>

<sup>1</sup>West Virginia Clinical & Translational Science Institute, Morgantown, WV; <sup>2</sup>Thomas Jefferson University, Philadelphia, PA; <sup>3</sup>Joint Clinical Research Centre, Kampala, Uganda; <sup>4</sup>Georgia Dept of Public Health, Coastal Health District, Chatham Care Center, Savannah, GA; <sup>5</sup>HIV Netherlands Australia Thailand Research Collaboration, The Thai Red Cross AIDS Research Centre, Bangkok, Thailand; <sup>6</sup>Irkutsk Regional Center for Prevention and Control of AIDS and Infectious Diseases, Irkutsk, Russia; <sup>7</sup>Gilead Sciences, Inc., Foster City, CA

Gilead Sciences, Inc.  
333 Lakeside Drive  
Foster City, CA 94404  
800-445-3235

## Introduction

- Worldwide, women comprise 51% of people living with HIV, but remain underrepresented in clinical trials
- The integrase inhibitor–containing single-tablet regimen (elvitegravir/cobicistat/emtricitabine [FTC]/tenofovir disoproxil fumarate [E/C/F/TDF]) demonstrated superior efficacy to a protease inhibitor regimen (atazanavir [ATV] boosted by ritonavir [RTV] + FTC/TDF) in 575 treatment-naïve women at Week 48<sup>1</sup>
- Tenofovir alafenamide (TAF) has an improved renal and bone safety profile compared with TDF<sup>2,3</sup>
- TAF has been coformulated into a single-tablet regimen (E/C/F/TAF) that is recommended as an initial regimen in adults and adolescents<sup>4,5</sup>
- Virologically suppressed women in the aforementioned study were given the option to switch to E/C/F/TAF in an open-label extension (OLE) phase, adding to the clinical understanding of the safety and efficacy of E/C/F/TAF in women

## Methods

### Study Design (GS-US-236-0128; NCT01705574)

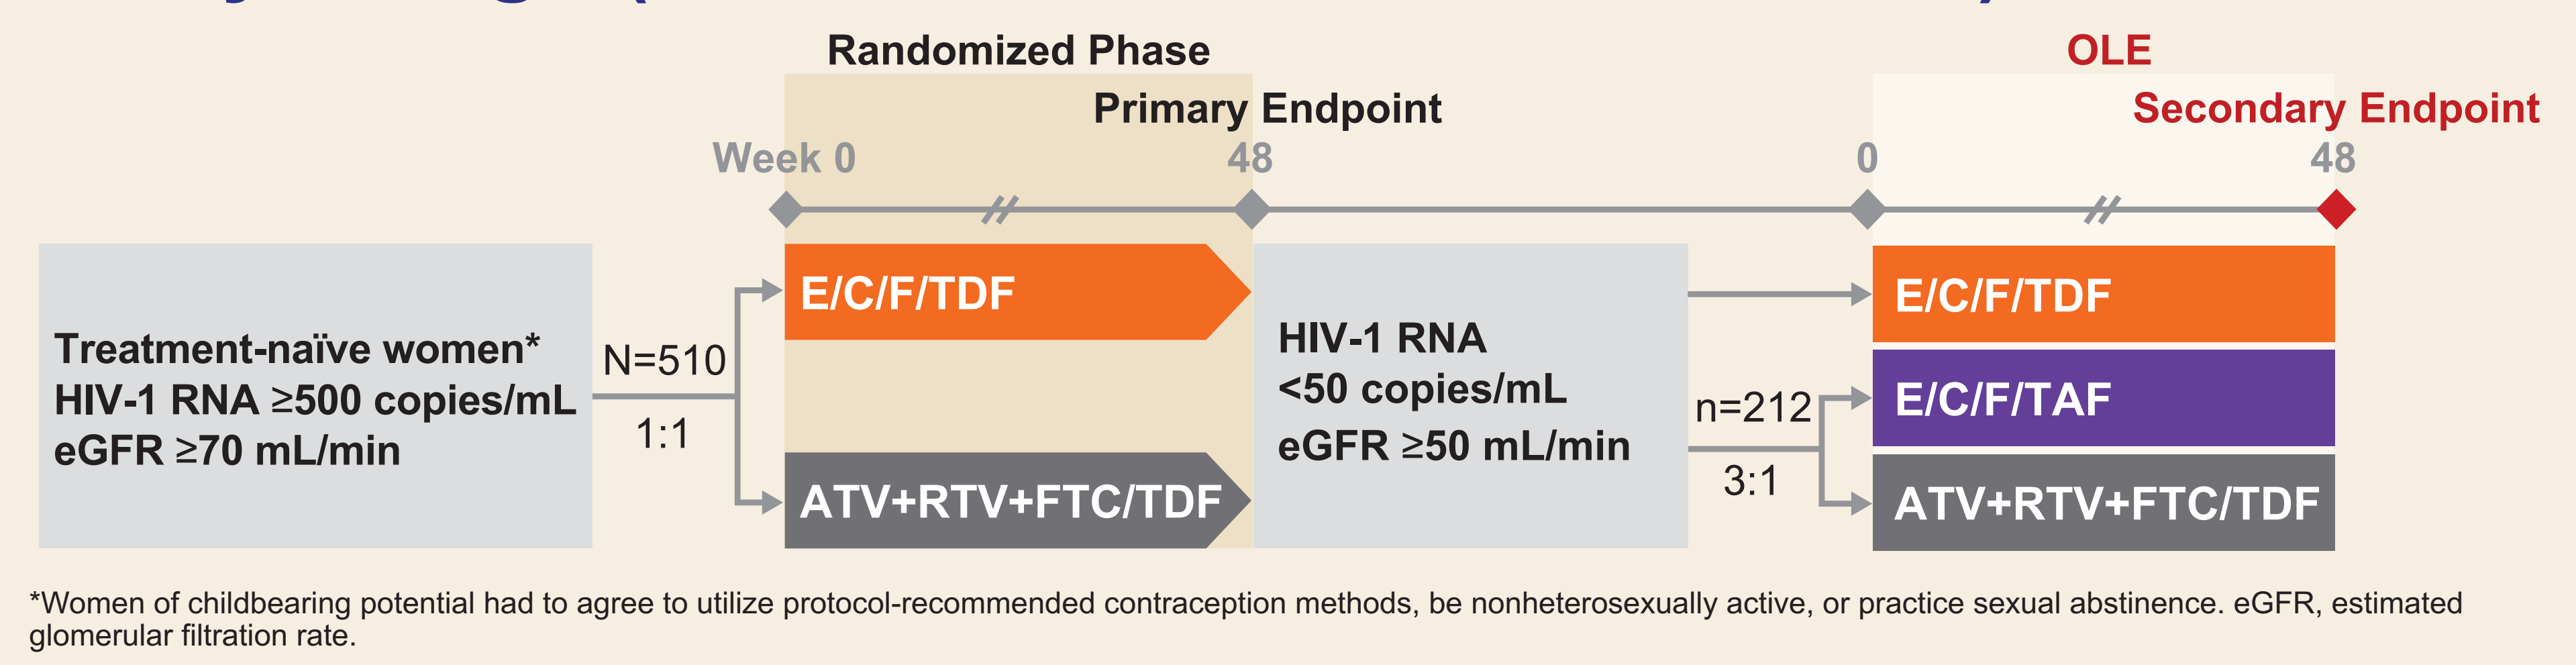

- Phase 3b, randomized, double-blind, active-controlled phase with rerandomized, open-label, active-controlled, extension phase
- Primary efficacy endpoint in randomized phase met: proportion of participants with HIV-1 RNA <50 copies/mL based on Week 48 FDA snapshot analysis<sup>1</sup>
- Secondary endpoints: efficacy, safety, and tolerability at Week 48 in OLE
- OLE Week 48 analysis (E/C/F/TAF vs ATV+RTV+FTC/TDF) is presented

## Results

### Disposition for Open-label Extension Phase

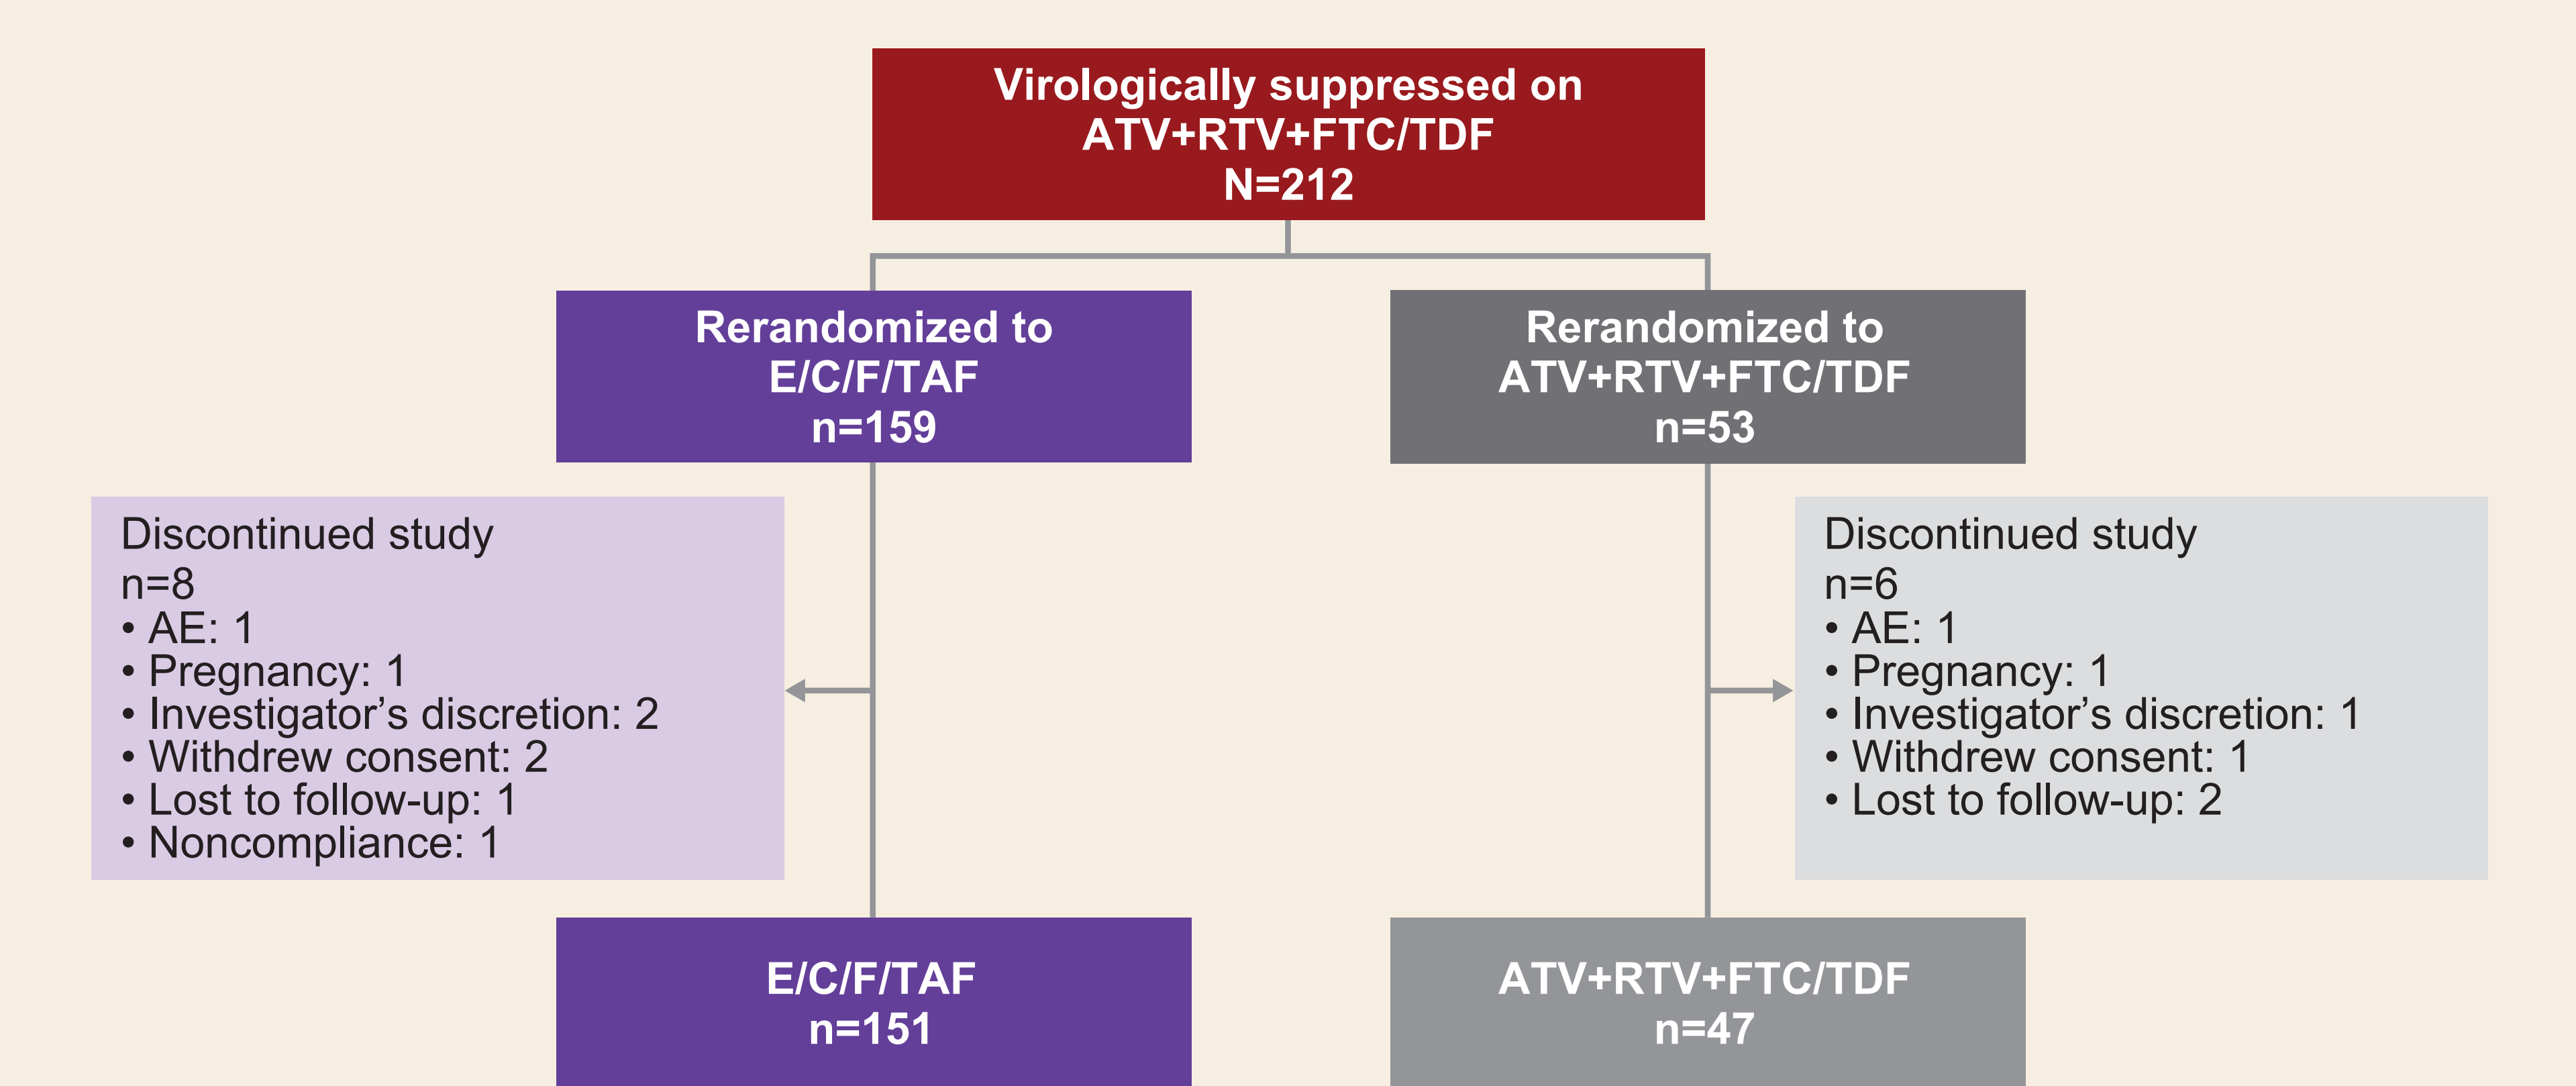

AE, adverse event.

### Demographics and Baseline Characteristics

|                                            | E/C/F/TAF<br>n=159 | ATV+RTV+FTC/TDF<br>n=53 |
|--------------------------------------------|--------------------|-------------------------|
| Median age, y (range)                      | 36 (19–63)         | 36 (21–62)              |
| Race, n (%)                                |                    |                         |
| Black                                      | 69 (43)            | 32 (60)                 |
| White                                      | 65 (41)            | 16 (30)                 |
| Asian                                      | 12 (8)             | 3 (6)                   |
| Latino/Hispanic, n (%)                     | 15 (9)             | 3 (6)                   |
| Median CD4 count, cells/μL (range)         | 580 (58–1602)      | 687 (96–1168)           |
| Median eGFR <sub>CG</sub> , mL/min (range) | 103 (53–260)       | 101 (35–229)            |
| Proteinuria grade, n (%) <sup>a</sup>      |                    |                         |
| 1                                          | 15 (9)             | 3 (6)                   |
| 2                                          | 0                  | 1 (2)                   |
| HBV surface antigen status, n (%)          |                    |                         |
| Negative                                   | 154 (97)           | 52 (98)                 |
| Positive                                   | 5 (3)              | 0                       |
| HCV antibody status, n (%)                 |                    |                         |
| Negative                                   | 145 (91)           | 48 (91)                 |
| Positive                                   | 14 (9)             | 4 (8)                   |

<sup>a</sup>No participants had Grade 3 or 4 proteinuria at baseline. CG, Cockcroft-Gault; HBV, hepatitis B virus; HCV, hepatitis C virus.

### Virologic Suppression (HIV-1 RNA <50 copies/mL) at Week 48

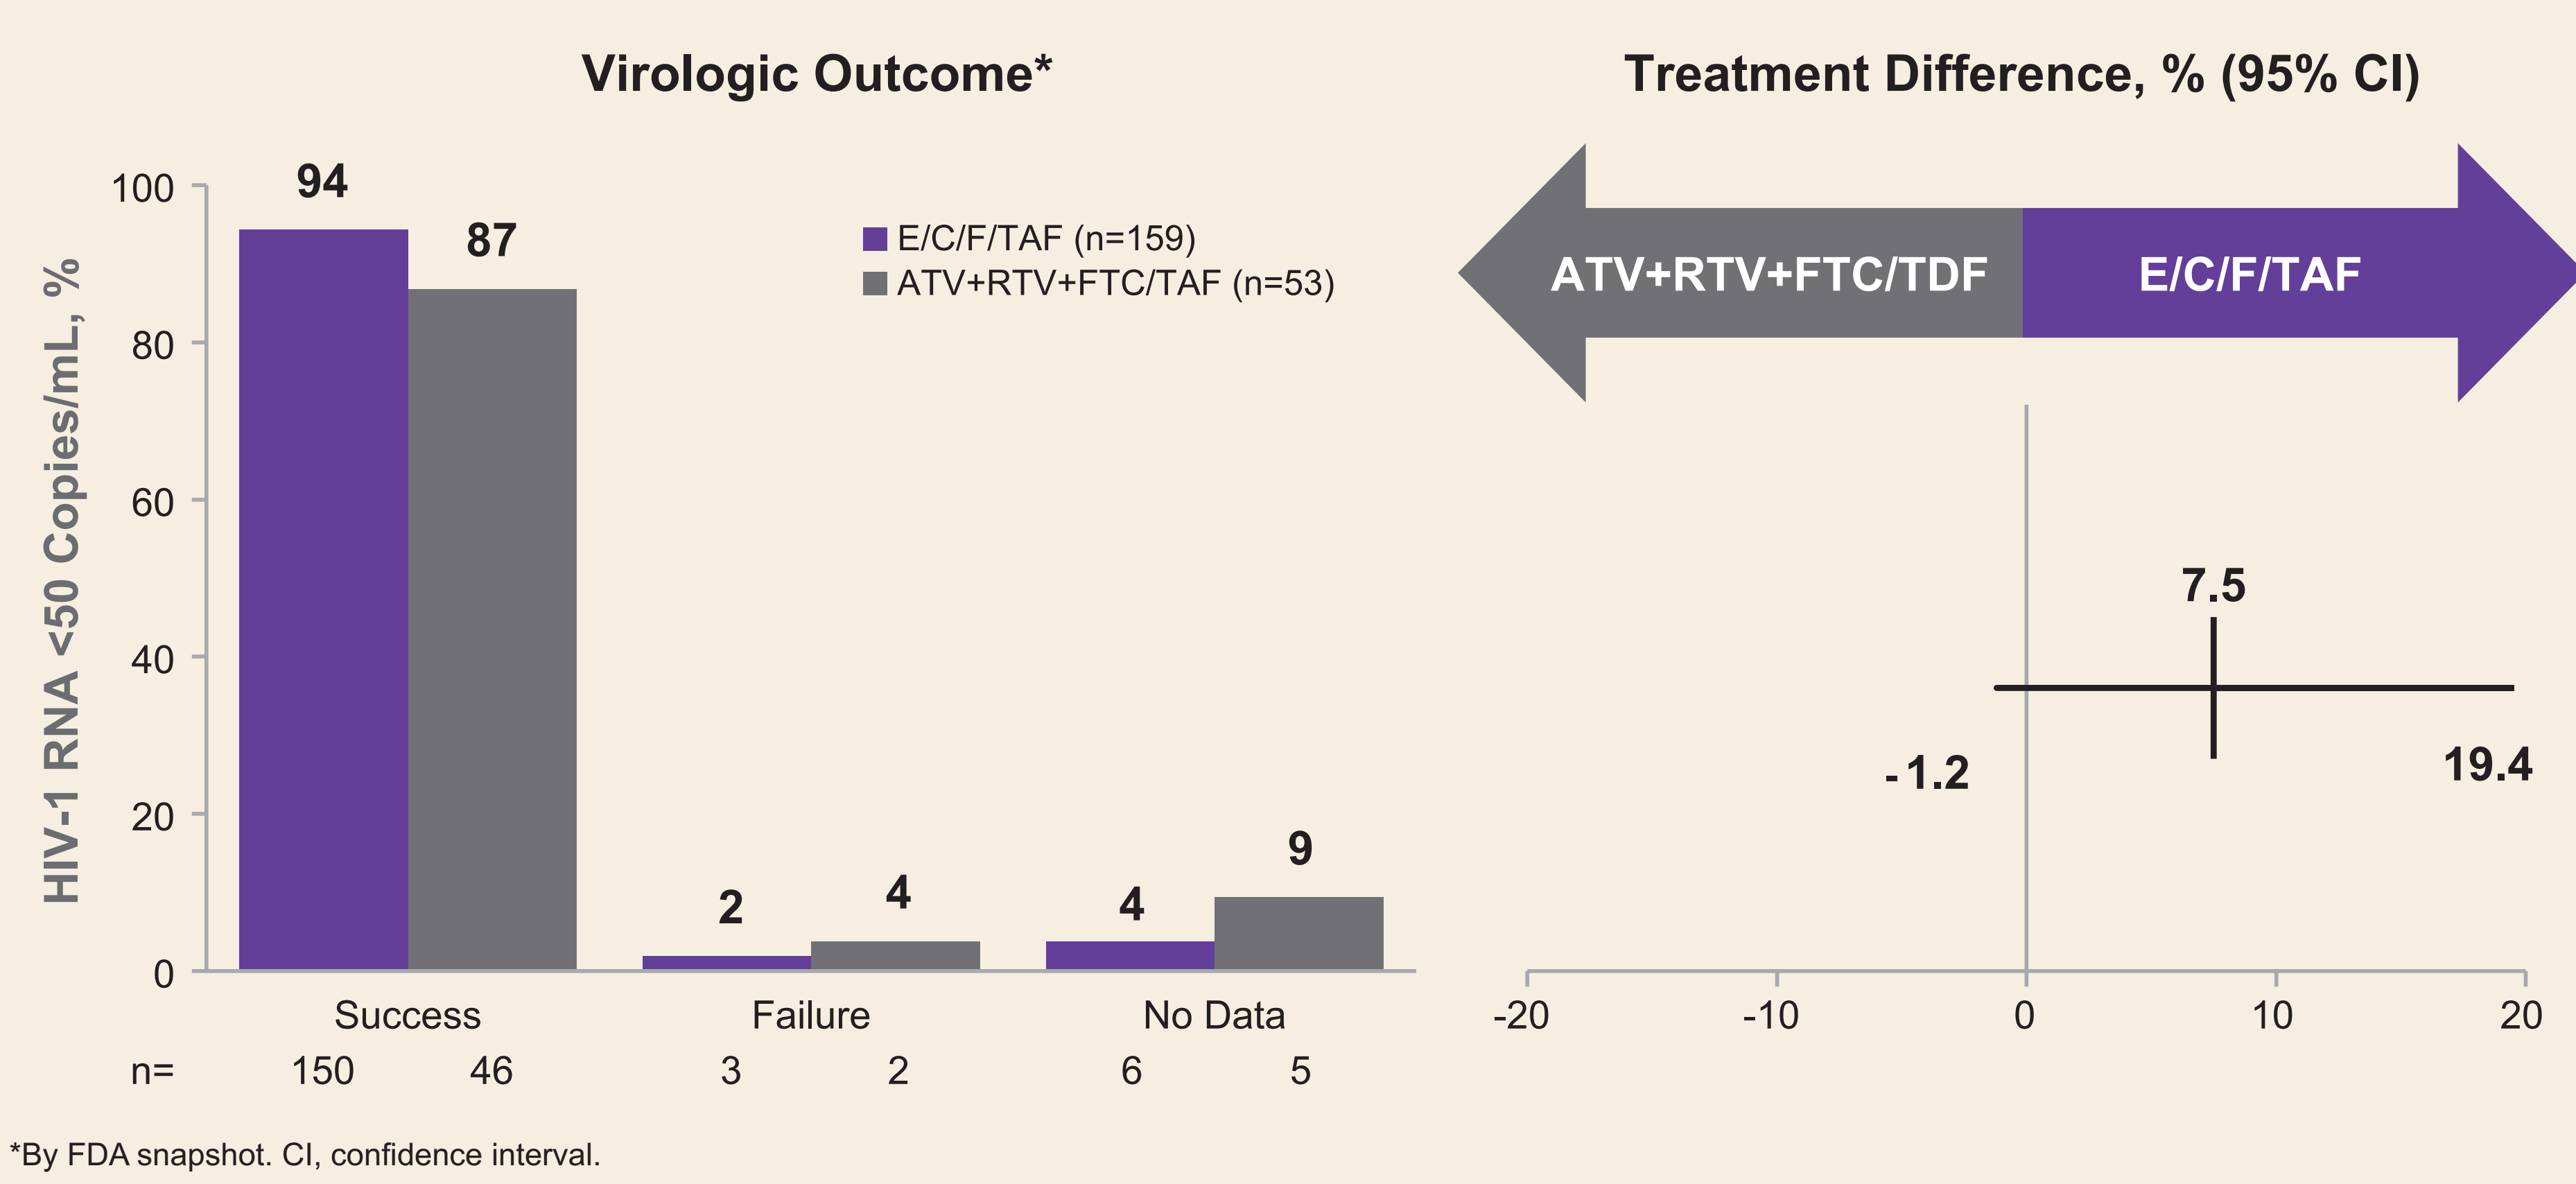

- Greater proportion of participants maintained virologic suppression with E/C/F/TAF vs ATV+RTV+FTC/TDF
- 85% on E/C/F/TAF vs 72% on ATV+RTV+FTC/TDF had HIV-1 RNA <20 copies/mL (difference 13%; 95% CI 0%, 28%)
- No emergent resistance mutations were detected in either group

### Summary of Most Common Adverse Events

| All Grades, n (%) <sup>a</sup>    | E/C/F/TAF<br>n=159 | ATV+RTV+FTC/TDF<br>n=53 |
|-----------------------------------|--------------------|-------------------------|
| Any treatment-emergent AE         | 111 (70)           | 31 (59)                 |
| Upper respiratory tract infection | 19 (12)            | 10 (19)                 |
| Headache                          | 15 (9)             | 3 (6)                   |
| Influenza                         | 11 (7)             | 1 (2)                   |
| Back pain                         | 11 (7)             | 1 (2)                   |
| Peripheral neuropathy             | 9 (6)              | 7 (13)                  |
| Nausea                            | 8 (5)              | 2 (4)                   |
| Vulvovaginal candidiasis          | 4 (3)              | 3 (6)                   |
| Abdominal pain                    | 3 (2)              | 3 (6)                   |

<sup>a</sup>≥5% in either group.

- 2 AEs leading to study drug discontinuation: confusional state (E/C/F/TAF) and hepatitis (ATV+RTV+FTC/TDF)

### Grade 3 or 4 Laboratory Abnormalities

| ≥1% in Either Group, n (%)                | E/C/F/TAF<br>n=158 | ATV+RTV+FTC/TDF<br>n=53 |
|-------------------------------------------|--------------------|-------------------------|
| Any Grade 3 or 4 laboratory abnormalities | 41 (26)            | 21 (40)                 |
| Hematuria                                 | 17 (11)            | 5 (9)                   |
| LDL                                       | 13 (8)             | 1 (2)                   |
| Hypercholesterolemia                      | 7 (5)              | 1 (2)                   |
| ALT                                       | 3 (2)              | 0                       |
| GGT                                       | 3 (2)              | 1 (2)                   |
| Hyperglycemia                             | 3 (2)              | 1 (2)                   |
| Neutropenia                               | 2 (1)              | 1 (2)                   |
| AST                                       | 2 (1)              | 1 (2)                   |
| Creatine kinase                           | 2 (1)              | 0                       |
| Amylase                                   | 1 (<1)             | 1 (2)                   |
| Glycosuria                                | 1 (<1)             | 1 (2)                   |
| Hyperbilirubinemia                        | 0                  | 15 (28)                 |
| Proteinuria                               | 0                  | 1 (2)                   |

ALT, alanine aminotransferase; AST, aspartate aminotransferase; GGT, γ-glutamyltransferase; LDL, low-density lipoprotein.

### Changes in Spine and Hip BMD Through Week 48<sup>a</sup>

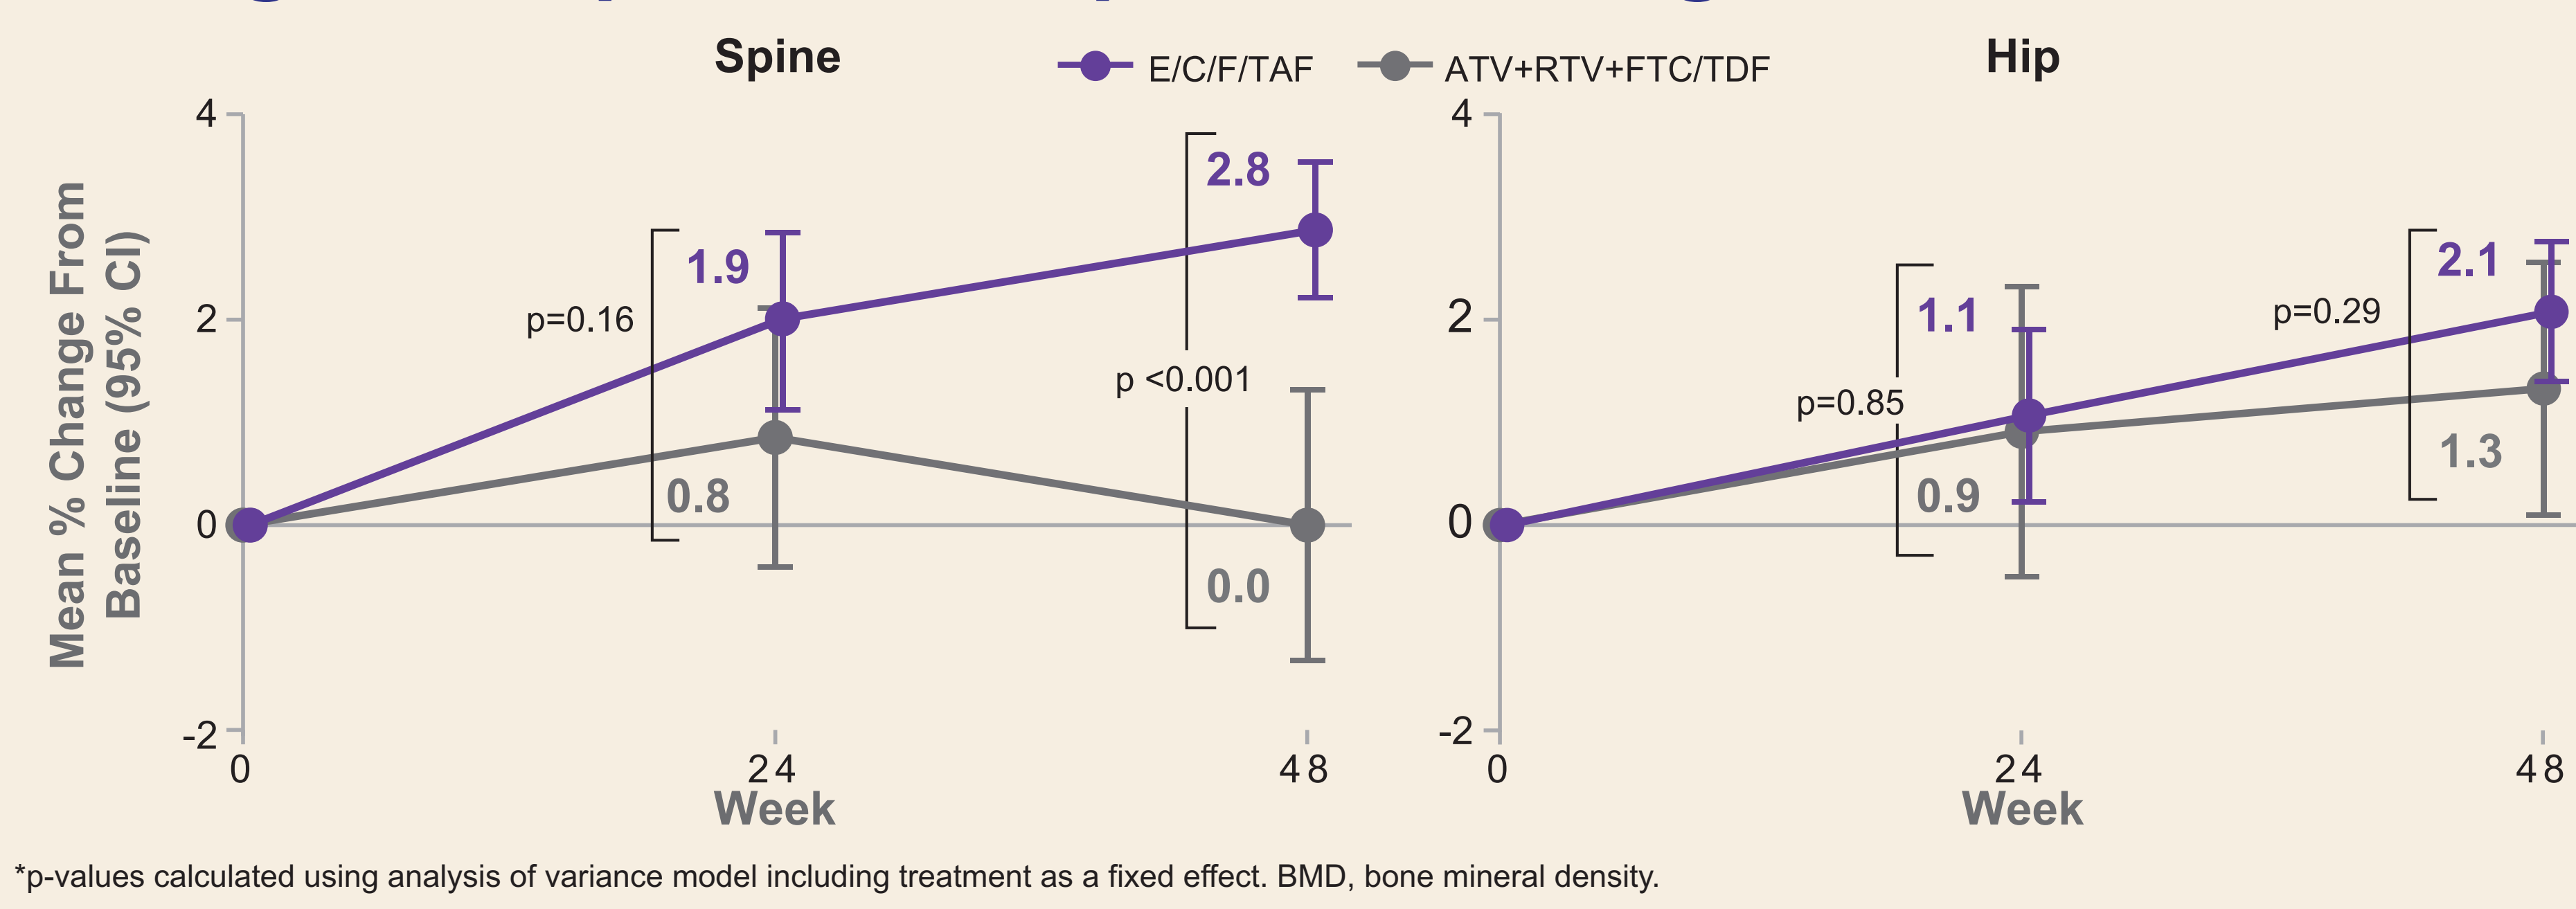

### Change in eGFR Through Week 48<sup>a</sup>

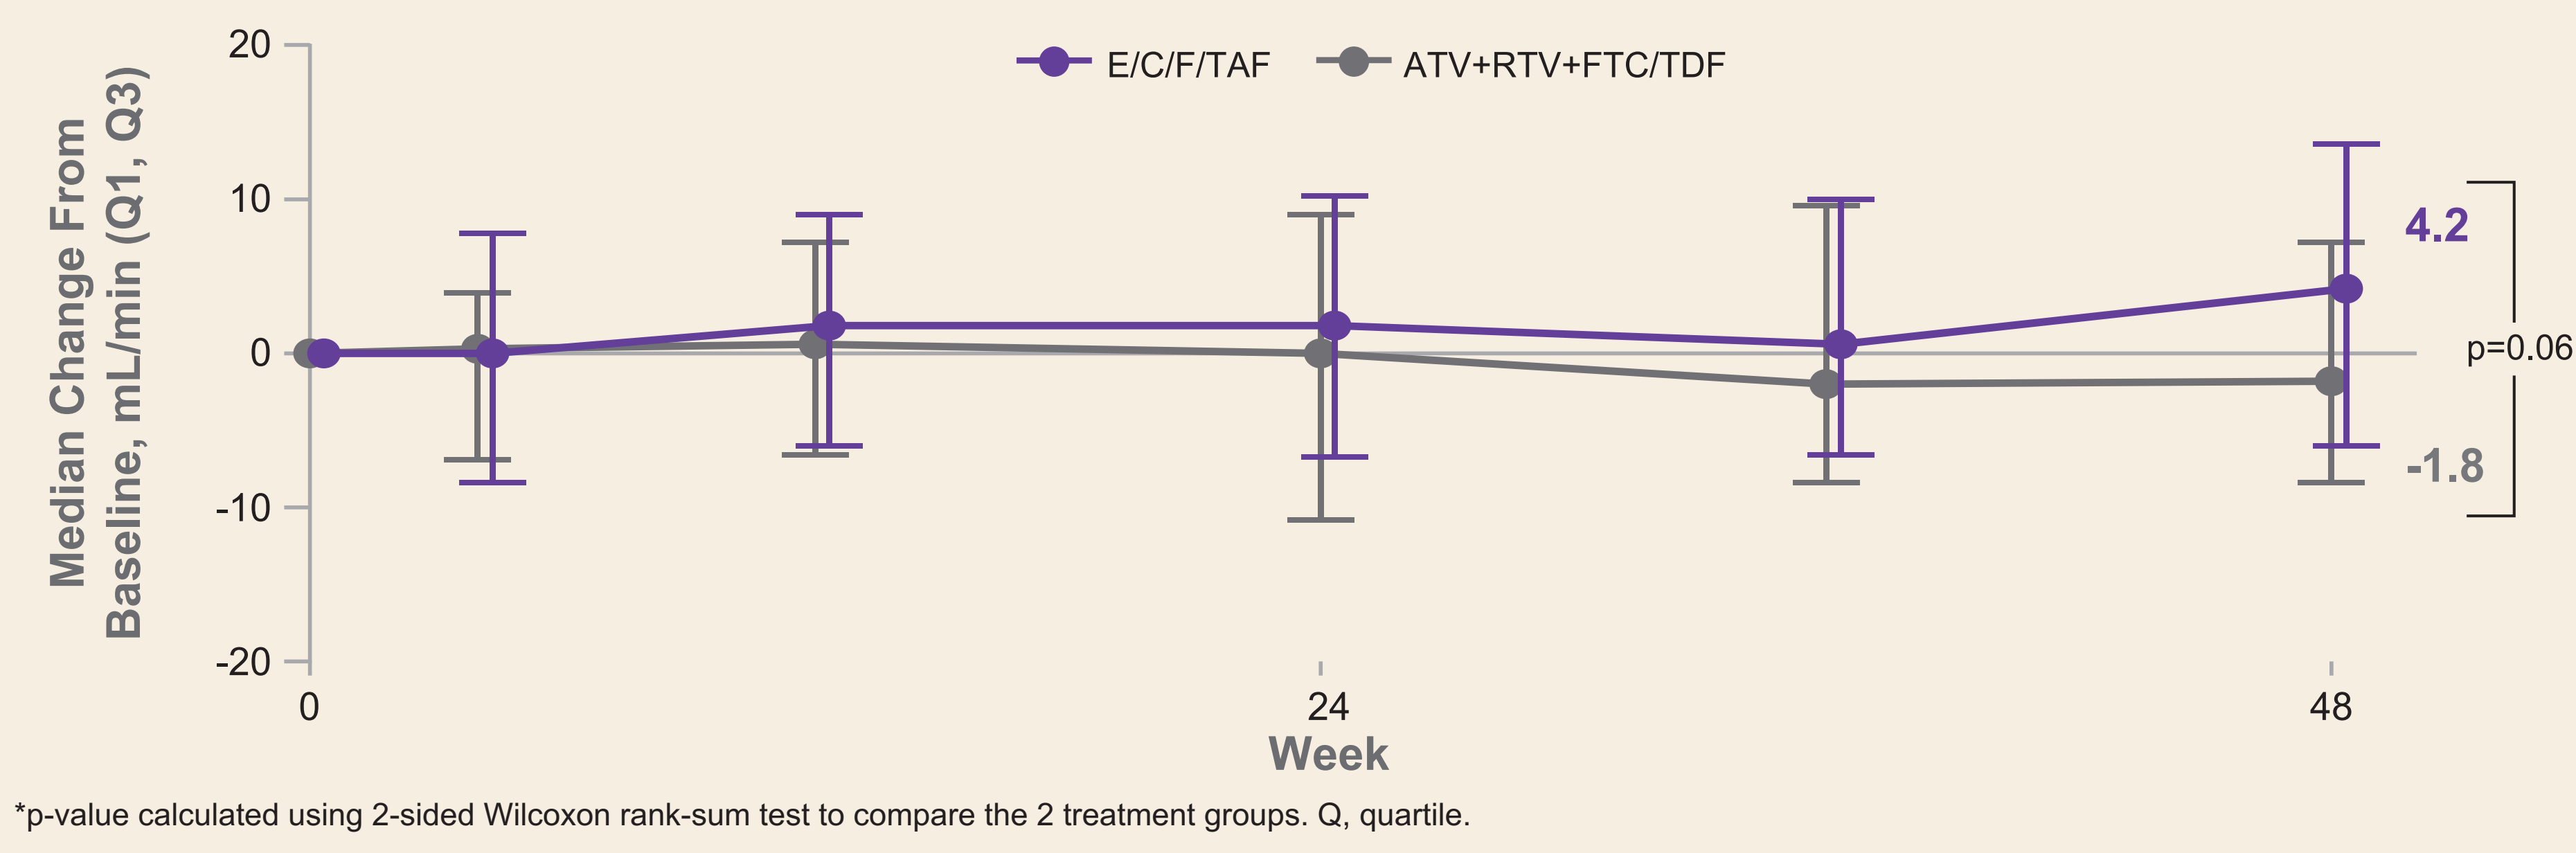

### Change in Tubular Proteinuria at Week 48<sup>a</sup>

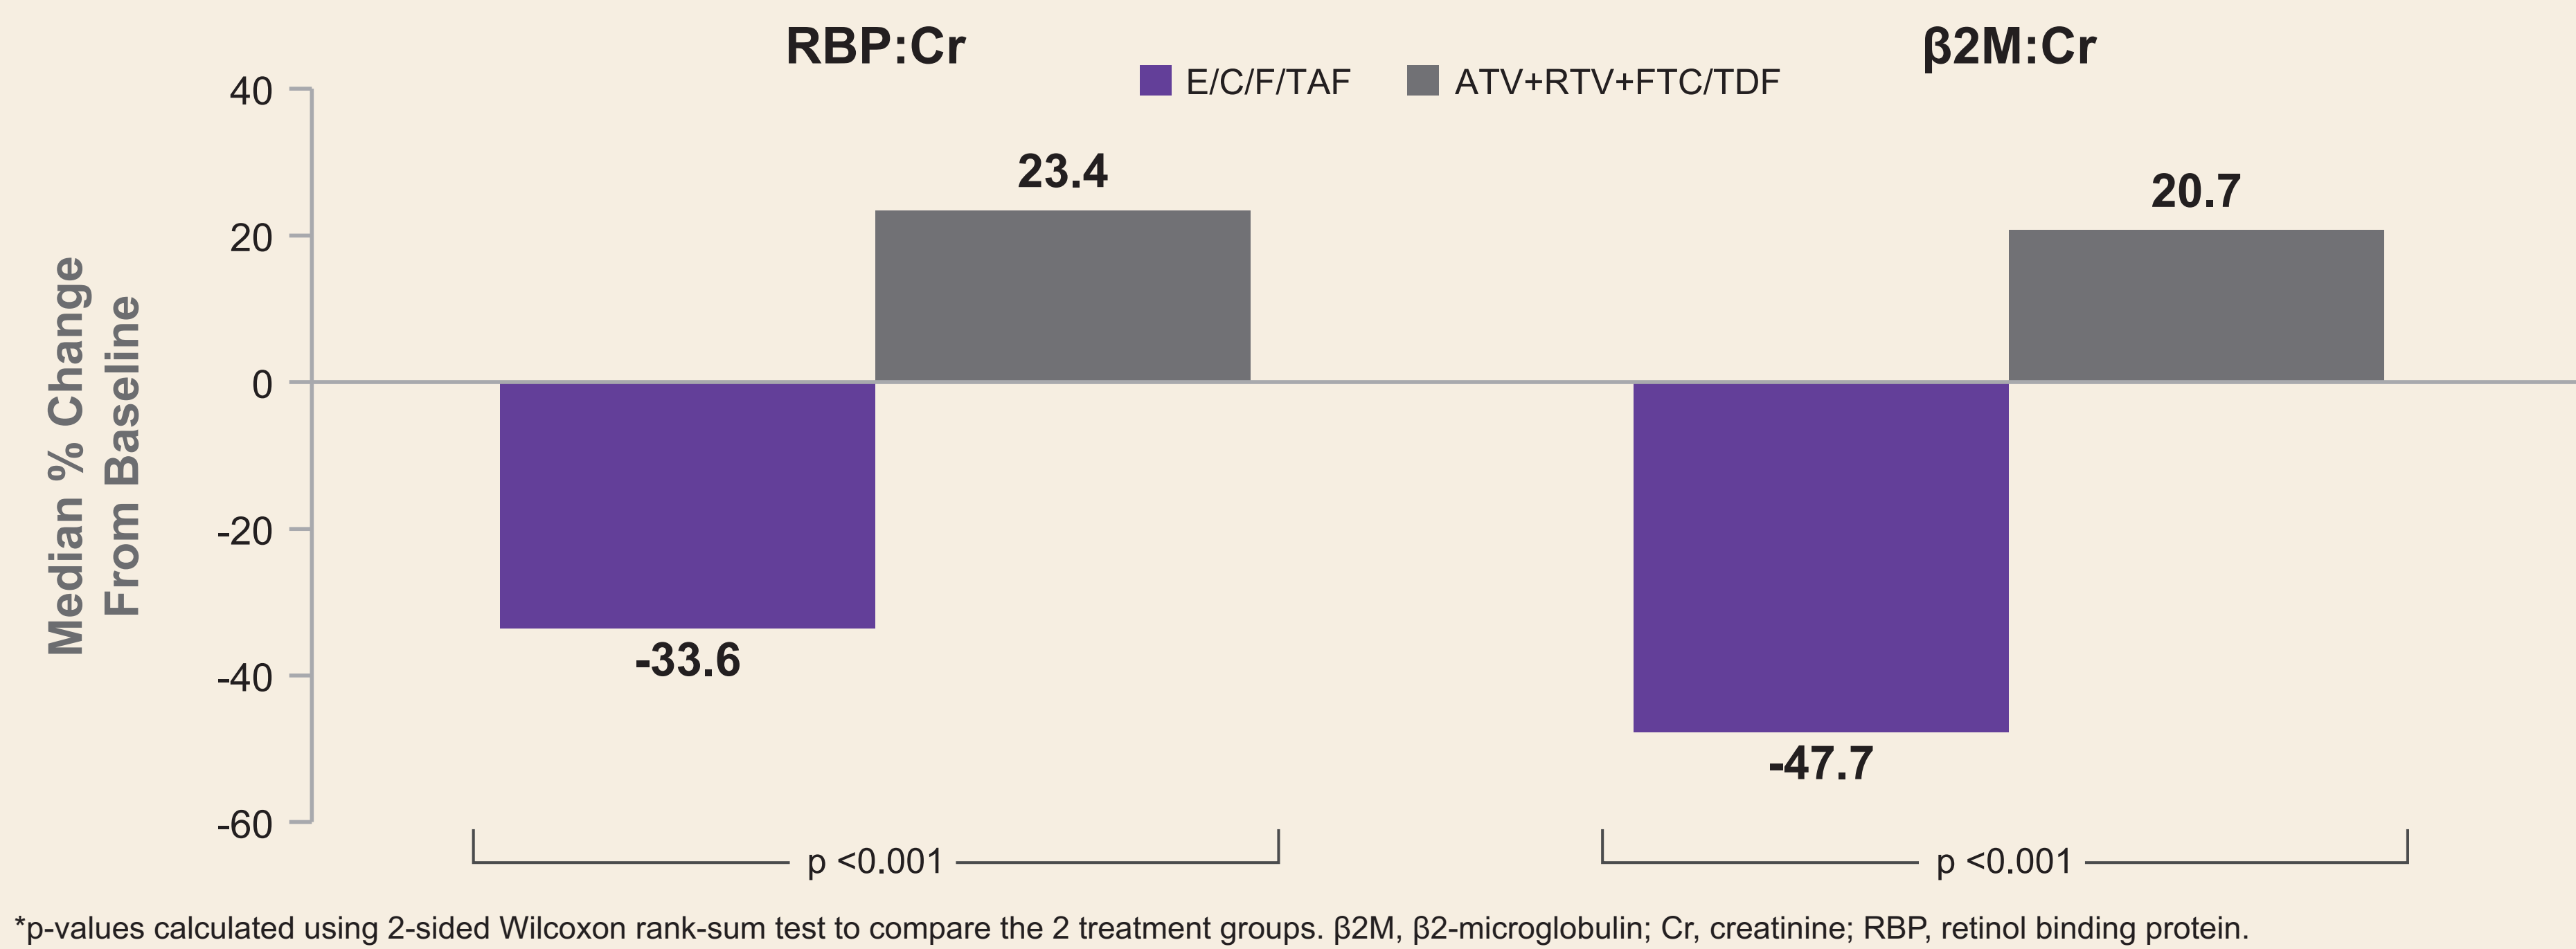

<sup>a</sup>p-values calculated using 2-sided Wilcoxon rank-sum test to compare the 2 treatment groups. β2M, β2-microglobulin; Cr, creatinine; RBP, retinol binding protein.

- No cases of proximal renal tubulopathy were reported in either arm

### Changes in Fasting Lipids at Week 48<sup>a</sup>

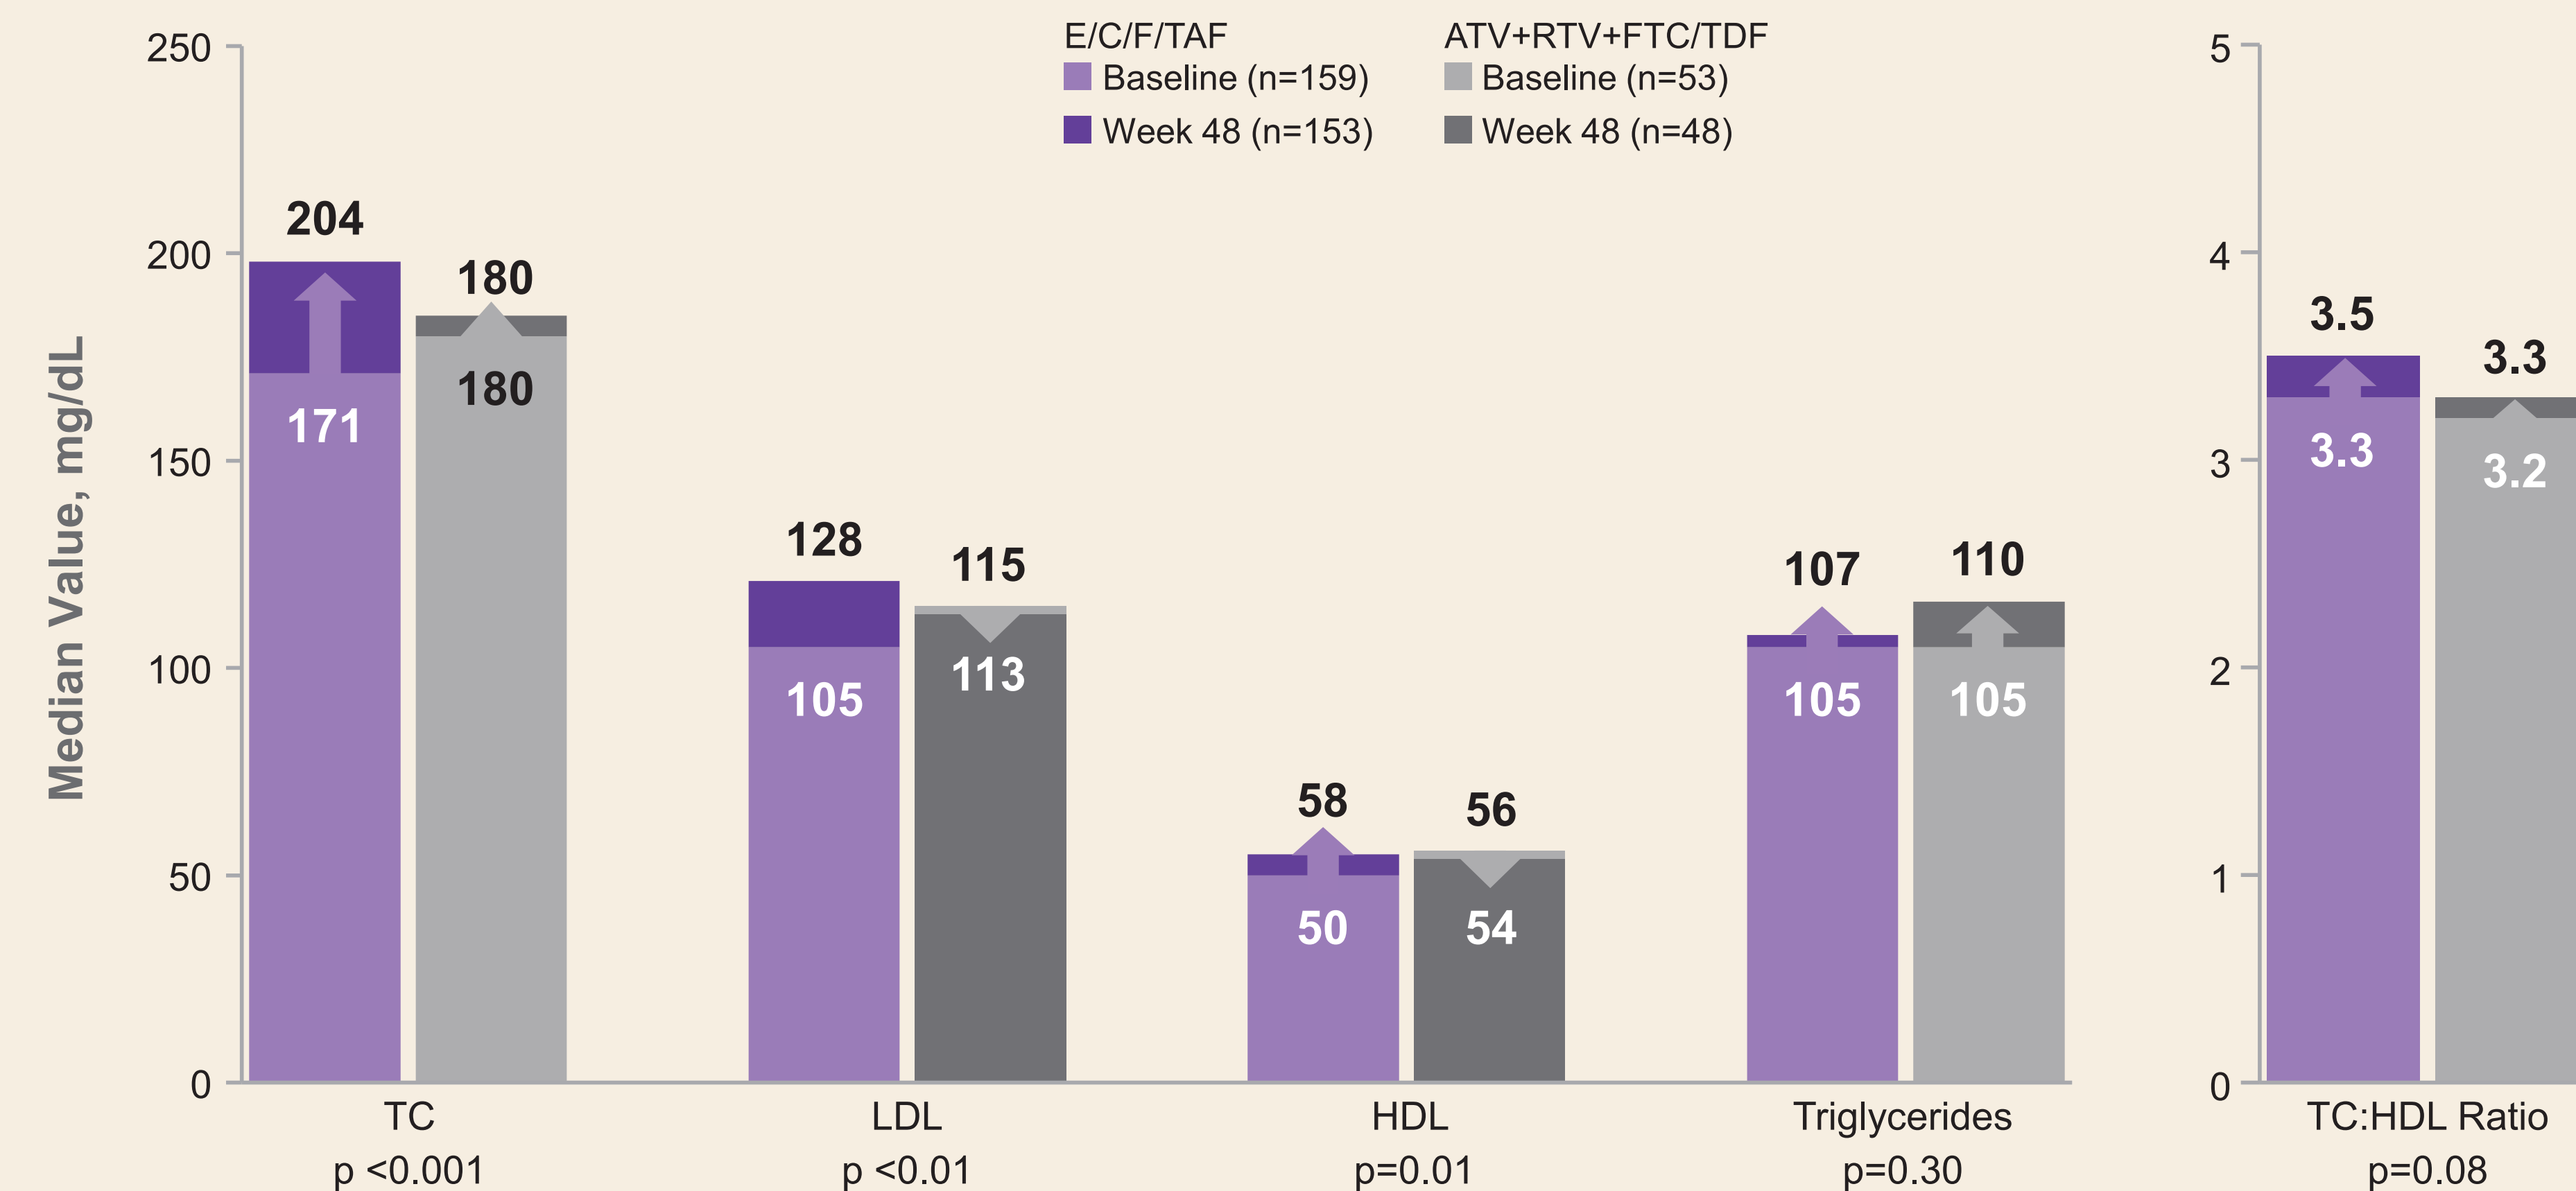

<sup>a</sup>p-values calculated using 2-sided Wilcoxon rank-sum test to compare change from baseline between the 2 treatment groups. HDL, high-density lipoprotein; TC, total cholesterol.

- Rates of initiation of lipid-modifying agents: E/C/F/TAF, 1%; ATV+RTV+FTC/TDF, 0%

### Pregnancies

|                      | E/C/F/TAF<br>n=159 | ATV+RTV+FTC/TDF<br>n=53 |
|----------------------|--------------------|-------------------------|
| Pregnancies, n       | 14                 | 6                       |
| Live birth           | 3                  | 3                       |
| Elective abortion    | 4                  | 1                       |
| Spontaneous abortion | 5                  | 1                       |
| Outcome pending      | 2                  | 1                       |

## Conclusions

- Women switching to E/C/F/TAF from a protease inhibitor–based regimen maintained high rates of virologic suppression (94%) through 48 wk
- E/C/F/TAF was generally well tolerated, and safety and discontinuation rates due to AEs were comparable between treatment groups
- E/C/F/TAF compared with ATV+RTV+FTC/TDF demonstrated statistically significant improvements in:
  - Spine BMD (p <0.001)
  - Tubular proteinuria (p <0.001)
- No difference in TC/HDL ratio between groups

### References

1. Squires K, et al. Lancet HIV 2016;3:e410-20; 2. Mills A, et al. 2015. Lancet Infect Dis 2016;16:43-52; 3. Sax PE, et al. Lancet 2015;385:2606-15; 4. Günthard HE, et al. JAMA 2016;316:191-210; 5. Panel on Antiretroviral Guidelines for Adults and Adolescents. US Dept of Health and Human Services: Washington, DC; Jan 28, 2016: <http://www.aidsinfo.nih.gov/ContentFiles/AdultandAdolescentGL.pdf>.

### Acknowledgments

We extend our thanks to the participants, their partners, and families, and all study investigators: JF Andrade Vilanueva, A Avihingsanon, Y Belonosova, M Boger, T Branco, C Brinson, F Chen, R Clark, N Clumeck, P Cook, A D'Arminio Monforte, E DeJesus, M Dorosova, R Dretler, J Duggan, N Dushkina, R Elion, E Florence, N Gankina, J Gathe, R Gilson, R Grossberg, DP Hagins, P Hay, M Hildebrand, S Hodder, M Hoffman-Terry, D Jayaweera, P Johnson III, M Johnson, C Katama, S Kierlbuanakul, MJ Kirby, C Kityo-Mutluluza, I Klevisova, E Koenig, C Kozlov, M Kulkarni, V Kulagin, A Kuznetsova, A Luque, N Mackie, CT Martorell, C Mayer, M McKellar, G Moshkovich, K Mounzer, C Mussini, C Orkin, E Orlova-Morozova, V Orlovsky, O Osiyemi, MF Para, K Patterson, G Plaloux, Y Plotnikova, R Pollard, V Porkovskiy, F Post, A Pronin, M Ramgopal, A Rana, I Reeves, D Rey, G Rizzardini, W Robbins, A Roberts, S Romanova, E Ryamova, R Sarmiento e Castro, R Serrao, T Shimonova, N Shmagel, A Shuliyakov, K Sirpassorn, J Slim, L Sloan, KE Squires, L Sultanov, K Supparatpinjo, S Swaminathan, E Tedaldi, E Teofilo, M Thompson, M Thormann, E Voronin, G Voskuhl, A Wilkin, D Wohl, A Yakovlev, S Yawetz, G-P Yen, and C Zorrilla. This study was funded by Gilead Sciences, Inc.
